# Supplementary material for: Solvent-free synthesis of new metal phosphite–oxalates with open-framework structures
Source: Royal Society of Chemistry journal article supplement (doi:10.1039/c4dt00202d), 2014-01-01
Supplement: c4dt00202d1.pdf [file c4dt00202d1.pdf]

## **Solvent-free synthesis of new metal phosphite-oxalates with open- framework structures**

Lin Liu,<sup>a</sup> Daibing Luo,<sup>b</sup> Defu Li,<sup>a</sup> and Zhien Lin<sup>b,\*</sup>

<sup>a</sup> *College of Chemistry, Sichuan University, Chengdu 610064, People's Republic of China.*

<sup>b</sup> *Analytical & Testing Center, Sichuan University, Chengdu 610064, People's Republic of China.*

\* To whom correspondence should be addressed. Tel: +86-28-85412284. E-mail:

zhienlin@scu.edu.cn

### **Physical measurements:**

IR spectra (KBr pellets) were recorded on an Nicolet Impact 410 FTIR spectrometer. Powder X-ray diffraction (XRD) data were obtained using a Rigaku D/MAX-rA diffractometer with Cu-K $\alpha$  radiation ( $\lambda = 1.5418 \text{ \AA}$ ). The thermogravimetric analyses were performed on a Netzsch STA 449c analyzer in a flow of N<sub>2</sub> with a heating rate of 10 °C/min. The fluorescent spectra were measured on a Perkin-Elmer LS 55 luminescence spectrometer equipped with a 450 W xenon lamp.

### **Synthesis**

**Synthesis of CN<sub>3</sub>H<sub>6</sub>·Co(H<sub>2</sub>PO<sub>3</sub>)(C<sub>2</sub>O<sub>4</sub>) (1):** A mixture of Co(OAc)<sub>2</sub>·4H<sub>2</sub>O (0.247 g), H<sub>3</sub>PO<sub>3</sub> (0.173 g), H<sub>2</sub>C<sub>2</sub>O<sub>4</sub>·2H<sub>2</sub>O (0.251 g), and guanidinium carbonate (0.312 g) was sealed in a Teflon-lined stainless steel autoclave and heated at 150 °C for 7 d. The autoclave was subsequently allowed to cool to room temperature. Red crystals were recovered by filtration, washed with distilled water, and finally dried at ambient temperature (14.4 % yield based on cobalt).

**Synthesis of (CN<sub>3</sub>H<sub>6</sub>)<sub>2</sub>·Mn<sub>2.5</sub>(HPO<sub>3</sub>)(C<sub>2</sub>O<sub>4</sub>)<sub>2.5</sub>(H<sub>2</sub>O)·H<sub>2</sub>O (2):** A mixture of Mn(OAc)<sub>2</sub>·4H<sub>2</sub>O (0.569 g), H<sub>3</sub>PO<sub>3</sub> (0.178 g), H<sub>2</sub>C<sub>2</sub>O<sub>4</sub>·2H<sub>2</sub>O (0.292 g), and guanidinium carbonate (0.360 g) was sealed in a Teflon-lined stainless steel autoclave and heated at 150 °C for 10 d. The autoclave was subsequently allowed to cool to room temperature. Light-pink crystals were recovered by filtration, washed with distilled water, and finally dried at ambient temperature (18.9 % yield based on manganese).

**Table 1.** Summary of hydrogen bonding information for **1**

| D-H...A <sup>a</sup> | d(D-H)/Å | d(H-A)/Å | d(D-A)/Å | <(DHA)/degree |
|----------------------|----------|----------|----------|---------------|
| O1-H2...O2_#1        | 0.82     | 1.91     | 2.716(3) | 167.8         |
| N1-H3...O4_#2        | 0.86     | 2.09     | 2.935(3) | 165.4         |
| N1-H4...O7_#3        | 0.86     | 2.27     | 2.903(3) | 130.9         |
| N2-H5...O5_#2        | 0.86     | 2.05     | 2.879(3) | 162.3         |
| N3-H8...O6_#3        | 0.86     | 2.23     | 3.086(3) | 178.0         |

<sup>a</sup> Symmetry transformations used to generate equivalent atoms: #1 -x+3/2, y+1/2, -z+1/2; #2 -x+1, -y+1, -z ; #3 x-1, y+1, z. The hydrogen atoms are located at calculated positions.

**Table 2.** Summary of hydrogen bonding information for **2**

| D-H...A <sup>a</sup> | d(D-H)/Å | d(H-A)/Å | d(D-A)/Å | <(DHA)/degree |
|----------------------|----------|----------|----------|---------------|
| OW1-H2...O3_\$1      | 0.85     | 1.91     | 2.746(3) | 167.1         |
| OW1-H3...O6_\$2      | 0.85     | 2.01     | 2.824(3) | 160.6         |
| OW2-H4...O1          | 0.97     | 2.38     | 2.993(4) | 120.5         |
| N1-H6...O5_\$3       | 0.86     | 2.18     | 2.926(4) | 144.7         |
| N1-H7...O2_\$1       | 0.86     | 2.00     | 2.842(4) | 166.3         |
| N2-H8...O10_\$4      | 0.86     | 2.12     | 2.963(5) | 167.0         |
| N3-H10...O4_\$3      | 0.86     | 2.12     | 2.974(4) | 169.4         |
| N3-H11...O11_\$4     | 0.86     | 2.04     | 2.862(4) | 159.0         |
| N6-H12...O1          | 0.86     | 2.29     | 3.139(6) | 171.0         |
| N6-H13...OW2_\$5     | 0.86     | 2.33     | 3.110(7) | 150.3         |

<sup>a</sup> Symmetry transformations used to generate equivalent atoms: #1 -x+1, -y, -z+1; #2 x, y, z-1; #3 -x+2, -y, -z+1; #4 -x+1, -y+1, -z+1; #5 -x, -y, -z+2. The hydrogen atoms are located at calculated positions.

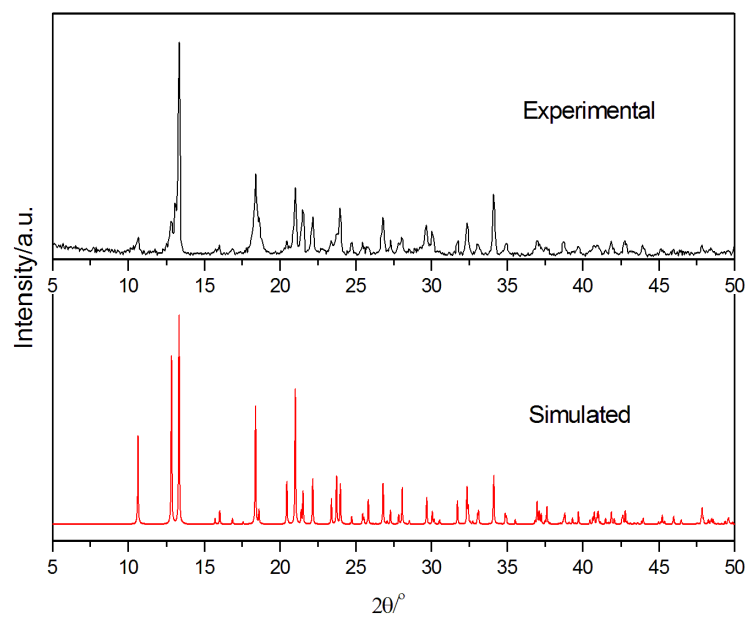

**Fig. S1.** Experimental and simulated powder XRD patterns of compound **1**.

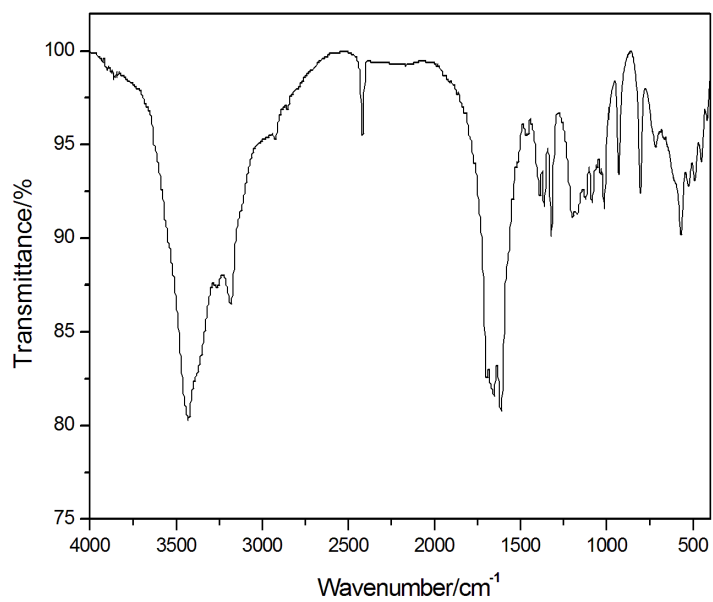

**Fig. S2.** IR spectrum of compound **1**.

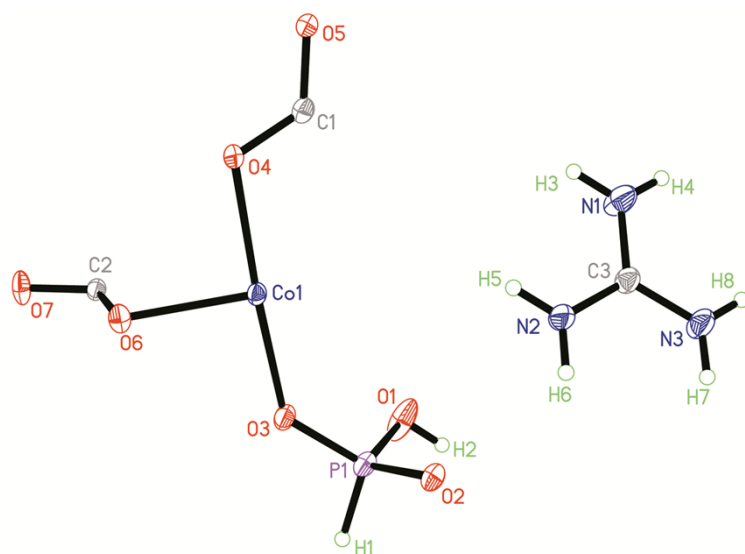

**Fig. S3.** ORTEP plot of the asymmetric unit of compound **1**, showing the labeling scheme and the 30% probability displacement ellipsoid.

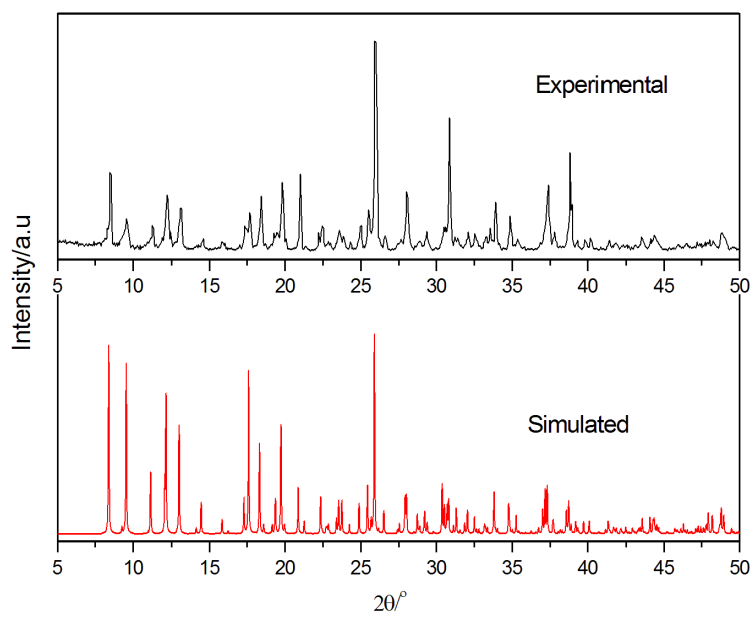

**Fig. S4.** Experimental and simulated powder XRD patterns of compound **2**.

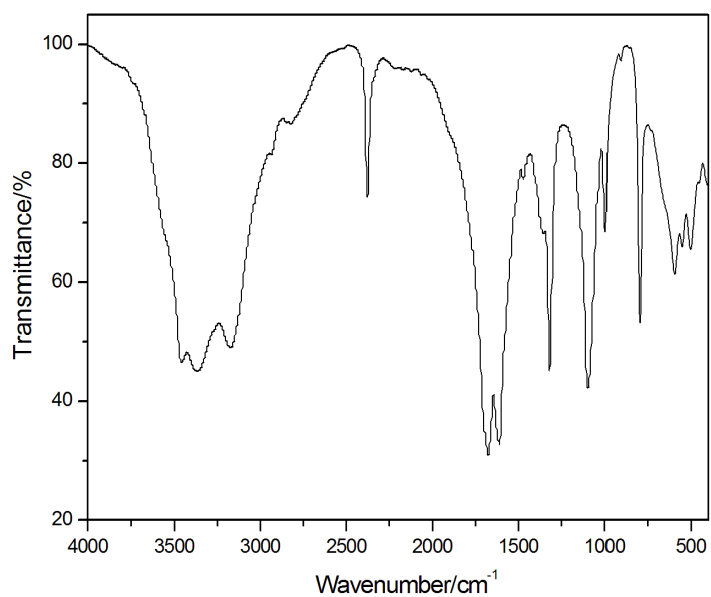

**Fig. S5.** IR spectrum of compound **2**.

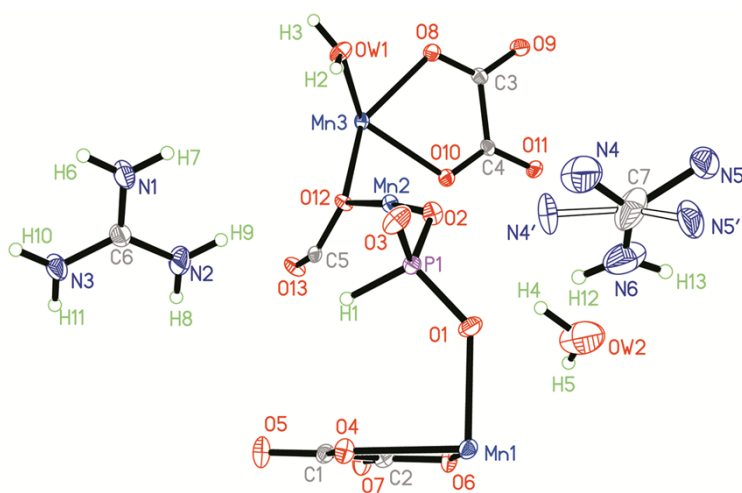

**Fig. S6.** ORTEP plot of the asymmetric unit of compound **2**, showing the labeling scheme and the 30% probability displacement ellipsoid.

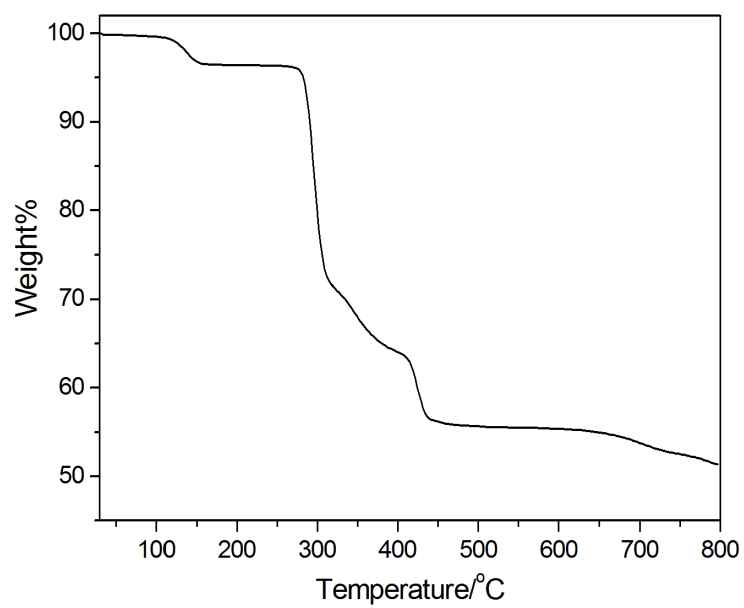

**Fig. S7.** TGA curve of compound 1.

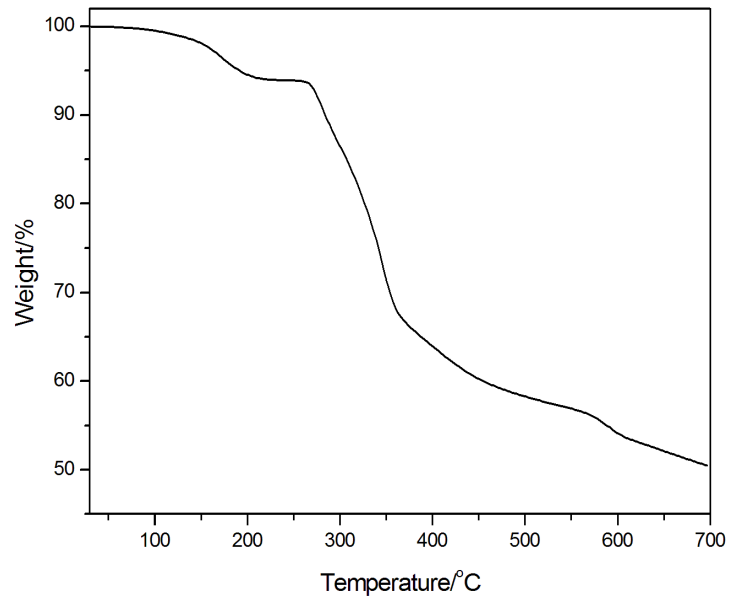

**Fig. S8.** TGA curve of compound 2.

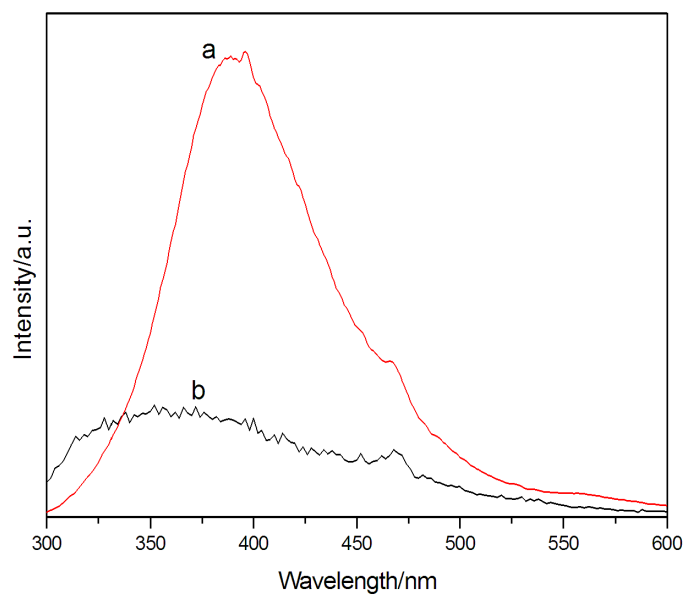

**Fig. S9.** Solid state fluorescent spectra of (a) compound **1** and (b) guanidinium carbonate at room temperature ( $\lambda_{\text{ex}} = 220$  nm).

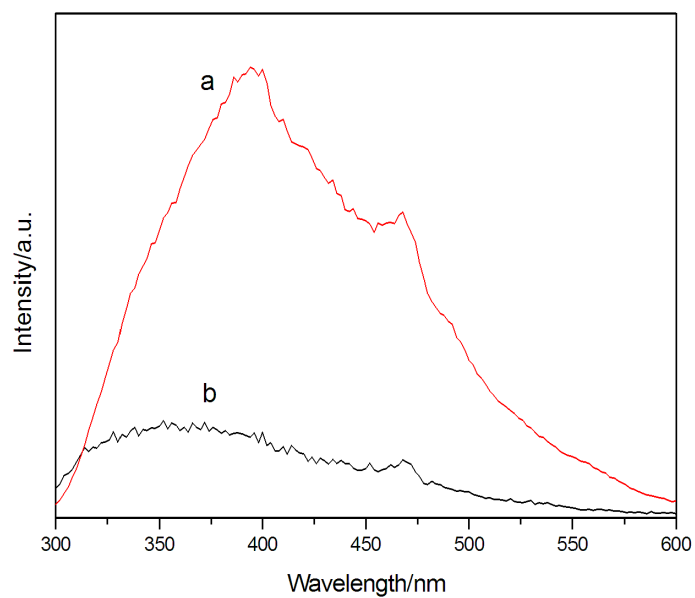

**Fig. S10.** Solid state fluorescent spectra of (a) compound **2** and (b) guanidinium carbonate at room temperature ( $\lambda_{\text{ex}} = 220$  nm).
